# Supplementary material for: Different Transport Behaviors between Asian Dust and Polycyclic Aromatic Hydrocarbons in Urban Areas: Monitoring in Fukuoka and Kanazawa, Japan
Source: MDPI journal article supplement (doi:10.3390/app12115404), 2022-05-26
Supplement: s1 [file s1]

Archive with 1 entries (1 files):
- applsci-1736785-supplementary.pdf
